# Supplementary material for: Multi-temporal ecological niche modeling for bird conservation in the face of climate change scenarios in Caatinga, Brazil
Source: PeerJ. 2023 Feb 27;11:e14882. doi: 10.7717/peerj.14882 (PMC9979838; doi:10.7717/peerj.14882)
Supplement: Supplemental Information 1 — Geographic coordinates [file peerj-11-14882-s001.xls]

## Sheet: Planilha1
Species	Long	Lat
sp1	-39.0317	-9.933
sp1	-38.7316	-10.5433
sp1	-38.4808	-10.075
sp1	-38.335	-9.3895
sp1	-38.7064	-9.9567
sp1	-39.1598	-9.9638
sp1	-38.7513	-9.9347
sp1	-38.6445	-9.872
sp1	-38.7064	-9.9567
sp1	-38.2818	-9.9265
sp1	-38.4851	-10.0542
sp1	-38.6445	-9.872
sp1	-38.9865	-9.9422
sp1	-39	-10.4343
sp1	-39.0317	-9.933
sp1	-39.0317	-9.933
sp1	-39.0317	-9.933
sp1	-39.0317	-9.933
sp1	-38.6445	-9.872
sp1	-39.0317	-9.933
sp1	-39.0317	-9.933
sp1	-39.0317	-9.933
sp1	-39.0317	-9.933
sp1	-39.0317	-9.933
sp1	-39.0317	-9.933
sp1	-39.0317	-9.933
sp1	-39.0317	-9.933
sp1	-39.0317	-9.933
sp1	-39.0317	-9.933
sp1	-39.0317	-9.933
sp1	-38.4808	-10.075
sp1	-39.0317	-9.933
sp1	-39.0317	-9.933
sp1	-38.613	-9.4685
sp1	-38.2817	-9.9265
sp1	-38.3299	-10.0314
sp1	-38.4453	-10.0917
sp1	-38.4816	-10.0276
sp1	-38.4911	-9.861
sp1	-38.4899	-9.8113
sp1	-38.6377	-9.8737
sp1	-38.6818	-9.9546
sp1	-38.6871	-9.9059
sp1	-38.7072	-9.9541
sp1	-38.7467	-9.9223
sp1	-38.8222	-9.9017
sp1	-38.7044	-10.1996
sp1	-38.7833	-10.3782
sp1	-38.9999	-10.4344
sp1	-39.0013	-10.0168
sp1	-38.9957	-9.9562
sp1	-39.0204	-9.944
sp1	-39.0244	-9.9045
sp1	-39.0281	-9.8961
sp1	-39.0166	-9.883
sp1	-39.0963	-9.9605
sp1	-39.1473	-9.9218
sp1	-39.2404	-10.0107
sp2	-40.9167	-4.83333
sp2	-44.6835	-10.2337
sp2	-44.6835	-10.2337
sp2	-40.9167	-4.83333
sp2	-42.3333	-8.41667
sp2	-43.4833	-9.21667
sp2	-44.2389	-9.69122
sp2	-41.2892	-6.96167
sp2	-42.6865	-8.87225
sp2	-42.6865	-8.87225
sp2	-44.2389	-9.69122
sp2	-44.9073	-9.61156
sp2	-41.4104	-6.21842
sp2	-41.5589	-12.5289
sp2	-40.8235	-5.0897
sp2	-37.3028	-4.7847
sp2	-42.475	-14.0689
sp2	-40.6418	-7.3204
sp2	-42.4861	-8.7784
sp2	-43.8231	-9.3735
sp2	-40.864	-7.0816
sp2	-40.1549	-2.865
sp2	-40.0458	-7.21278
sp2	-40.8235	-5.0897
sp2	-39.4089	-7.23389
sp2	-40.3708	-3.8734
sp2	-37.3028	-4.7847
sp2	-39.5853	-4.578
sp2	-40.4547	-3.5332
sp2	-38.6261	-3.9719
sp2	-39.0512	-3.4208
sp2	-39.1133	-3.4045
sp2	-40.0898	-7.0997
sp2	-39.0315	-4.9791
sp2	-39.9064	-4.4224
sp2	-40.2388	-3.6738
sp2	-36.0785	-5.2622
sp2	-36.57	-6.2858
sp2	-35.9456	-5.3636
sp2	-36.6576	-6.7996
sp2	-37.3944	-7.3302
sp2	-38.5746	-7.2224
sp2	-37.7302	-8.2678
sp2	-40.5681	-8.9507
sp2	-38.9178	-8.2385
sp2	-36.9801	-9.8366
sp2	-40.2303	-14.3222
sp2	-42.7435	-11.8726
sp2	-42.475	-14.0689
sp2	-41.4535	-11.7929
sp2	-39.01	-13.4767
sp2	-38.3238	-12.6978
sp2	-39.0317	-9.933
sp2	-39.2052	-11.5001
sp2	-41.1466	-13.7443
sp2	-38.7316	-10.5433
sp2	-45.2135	-11.0465
sp2	-38.4808	-10.075
sp2	-41.3892	-12.5793
sp2	-40.6131	-13.5358
sp2	-41.1431	-11.5409
sp2	-41.5589	-12.5289
sp2	-38.335	-9.3895
sp2	-41.6162	-12.4547
sp2	-41.6792	-9.8766
sp2	-44.0524	-14.8519
sp2	-42.6994	-9.01528
sp2	-42.6992	-9.01556
sp2	-41.5757	-12.5304
sp2	-42.5406	-14.3073
sp2	-38.9861	-7.3007
sp2	-40.8235	-5.0897
sp2	-40.6418	-7.3204
sp2	-42.4861	-8.7784
sp2	-43.8231	-9.3735
sp2	-41.7905	-2.9373
sp2	-40.7541	-6.6526
sp2	-42.736	-15.6366
sp2	-41.5752	-12.5434
sp2	-39.0317	-9.933
sp2	-38.4808	-10.075
sp2	-39.0317	-9.933
sp2	-39.5834	-7.2501
sp2	-39.0317	-9.933
sp2	-39.0317	-9.933
sp2	-41.5752	-12.5434
sp2	-39.0317	-9.933
sp2	-39.0317	-9.933
sp2	-38.4808	-10.075
sp2	-39.0317	-9.933
sp2	-39.0317	-9.933
sp2	-42.475	-14.0689
sp2	-41.5589	-12.5289
sp2	-42.6992	-9.01556
sp2	-41.3683	-12.5291
sp2	-40.9161	-5.1629
sp2	-39.5834	-7.2501
sp2	-40.9161	-5.1629
sp2	-39.0317	-9.933
sp2	-39.0317	-9.933
sp2	-39.0317	-9.933
sp2	-40.2303	-14.3222
sp2	-41.3388	-13.4361
sp2	-42.475	-14.0689
sp2	-41.5753	-12.5417
sp2	-39.0317	-9.933
sp2	-41.3388	-13.4361
sp2	-40.0649	-13.8938
sp2	-41.5752	-12.5434
sp2	-40.9161	-5.1629
sp2	-42.475	-14.0689
sp2	-41.4212	-12.7448
sp2	-40.9161	-5.1629
sp3	-44.5831	-10.25
sp3	-44.6392	-10.2275
sp3	-42.3333	-8.41667
sp3	-43.4833	-9.21667
sp3	-44.2389	-9.69122
sp3	-44.9073	-9.61156
sp3	-42.4861	-8.7784
sp3	-43.2542	-8.538
sp3	-35.0973	-6.8454
sp3	-36.9638	-10.4785
sp3	-36.8914	-10.5189
sp3	-44.9451	-12.2012
sp3	-40.2303	-14.3222
sp3	-41.1466	-13.7443
sp3	-41.2845	-13.3789
sp3	-39.1063	-14.8082
sp3	-38.4808	-10.075
sp3	-42.2978	-14.0895
sp3	-41.3411	-12.9829
sp3	-39.6603	-18.0912
sp3	-45.0169	-12.4201
sp3	-42.2884	-19.8039
sp3	-41.8662	-16.6944
sp3	-42.6104	-19.7514
sp3	-41.1431	-11.5409
sp3	-41.4458	-12.6243
sp3	-41.3411	-12.9829
sp3	-42.6104	-19.7514
sp3	-40.5473	-6.5245
sp3	-43.4449	-8.9871
sp3	-42.555	-8.8289
sp3	-35.94	-9.3029
sp3	-38.6377	-9.8737
sp3	-38.7044	-10.1996
sp3	-38.8045	-12.2508
sp3	-41.2733	-11.5156
sp3	-41.1534	-11.5587
sp3	-44.9994	-12.3136
sp3	-45.02	-12.1935
sp3	-44.9772	-12.3631
sp3	-40.3354	-14.6178
sp3	-40.2678	-14.5532
sp3	-40.1894	-14.3756
sp3	-40.2153	-14.3296
sp3	-42.5277	-14.2736
sp3	-41.4565	-13.0542
sp3	-41.4212	-12.7448
sp3	-41.3576	-12.5324
sp3	-41.3873	-12.5605
sp3	-41.473	-12.4573
sp3	-41.5773	-12.5161
sp3	-41.3746	-12.4688
sp3	-41.3624	-12.5113
sp3	-41.3624	-12.5113
sp3	-41.3633	-12.5544
sp4	-39.0135	-7.4951
sp4	-39.5499	-6.5811
sp4	-38.7624	-3.6639
sp4	-40.8235	-5.0897
sp4	-39.4089	-7.23389
sp4	-37.3028	-4.7847
sp4	-40.726	-4.3173
sp4	-39.5804	-3.6438
sp4	-40.4547	-3.5332
sp4	-40.0898	-7.0997
sp4	-38.9808	-3.6653
sp4	-41.0625	-3.72945
sp4	-39.2689	-3.27778
sp4	-35.2937	-5.6576
sp4	-35.9456	-5.3636
sp4	-35.3771	-5.9324
sp4	-35.1691	-5.9259
sp4	-35.7076	-5.6098
sp4	-35.3146	-5.8209
sp4	-38.5293	-7.4597
sp4	-38.5746	-7.2224
sp4	-38.069	-6.6326
sp4	-37.2518	-8.6321
sp4	-38.243	-8.401
sp4	-39.461	-7.8479
sp4	-37.3077	-8.7635
sp4	-37.4369	-9.74778
sp4	-36.9801	-9.8366
sp4	-44.9451	-12.2012
sp4	-40.2303	-14.3222
sp4	-39.8544	-13.1434
sp4	-42.7435	-11.8726
sp4	-42.475	-14.0689
sp4	-41.4535	-11.7929
sp4	-38.3238	-12.6978
sp4	-39.2052	-11.5001
sp4	-41.1466	-13.7443
sp4	-38.7316	-10.5433
sp4	-40.0649	-13.8938
sp4	-38.4808	-10.075
sp4	-40.3971	-13.6324
sp4	-42.2978	-14.0895
sp4	-41.1431	-11.5409
sp4	-41.3411	-12.9829
sp4	-41.6203	-11.9556
sp4	-41.5589	-12.5289
sp4	-38.335	-9.3895
sp4	-40.5938	-12.4036
sp4	-45.0169	-12.4201
sp4	-44.01	-13.3555
sp4	-41.6162	-12.4547
sp4	-40.1433	-10.4944
sp4	-41.6792	-9.8766
sp4	-44.1724	-12.4304
sp4	-41.1405	-12.0378
sp4	-42.042	-16.9309
sp4	-44.7843	-15.3093
sp4	-43.4742	-17.9915
sp4	-43.6	-18.2489
sp4	-43.2602	-18.0743
sp4	-41.8662	-16.6944
sp4	-44.4272	-15.4717
sp4	-43.9415	-16.7093
sp4	-41.2132	-15.7822
sp4	-43.0392	-15.8312
sp4	-42.4267	-16.29
sp4	-41.3041	-12.92
sp4	-41.1431	-11.5409
sp4	-39.4994	-7.2493
sp4	-37.4351	-9.7326
sp4	-41.5757	-12.5304
sp4	-40.2303	-14.3222
sp4	-39.5834	-7.2501
sp4	-48.444	-10.102
sp4	-39.2616	-3.3303
sp4	-54.8614	-9.38979
sp4	-48.54	-10.0187
sp4	-40.9161	-5.1629
sp4	-41.5773	-12.5475
sp4	-41.5755	-12.5417
sp4	-39.5834	-7.2501
sp4	-39.5834	-7.2501
sp4	-39.5306	-7.336
sp4	-39.5834	-7.2501
sp4	-38.4619	-10.0754
sp4	-40.2303	-14.3222
sp4	-40.2303	-14.3222
sp4	-41.5723	-12.5291
sp4	-40.2303	-14.3222
sp4	-41.5826	-12.5237
sp4	-40.2303	-14.3222
sp4	-41.3411	-12.9829
sp4	-40.2303	-14.3222
sp4	-40.1334	-14.4014
sp4	-39.3145	-7.1416
sp4	-41.5755	-12.5417
sp4	-41.5826	-12.5237
sp4	-39.5834	-7.2501
sp4	-39.5834	-7.2501
sp4	-40.2781	-14.4279
sp4	-39.5834	-7.2501
sp4	-40.2303	-14.3222
sp4	-40.2303	-14.3222
sp4	-41.4212	-12.7448
sp4	-41.5752	-12.5434
sp4	-39.3145	-7.1416
sp4	-40.0777	-7.18588
sp4	-43.45	-8.88
sp4	-39.5306	-7.336
sp4	-41.5773	-12.5162
sp4	-41.5752	-12.5434
sp4	-40.0839	-7.0855
sp4	-41.5753	-12.5417
sp4	-40.2303	-14.3222
sp4	-54.8614	-9.38979
sp4	-39.0386	-5.0744
sp4	-39.5834	-7.2501
sp4	-39.5834	-7.2501
sp4	-41.1431	-11.5409
sp4	-39.5834	-7.2501
sp4	-40.2303	-14.3222
sp4	-40.2303	-14.3222
sp4	-39.549	-7.30549
sp4	-44.2823	-15.1912
sp4	-39.3145	-7.1416
sp4	-40.2303	-14.3222
sp4	-41.1431	-11.5409
sp4	-48.5949	-9.7027
sp4	-54.8614	-9.3897
sp4	-48.4996	-10.0301
sp4	-48.4067	-10.0631
sp4	-48.4064	-10.09
sp4	-48.4535	-10.1404
sp4	-48.4557	-10.1022
sp4	-48.4429	-10.1039
sp4	-48.4351	-10.1029
sp4	-43.5309	-7.9526
sp4	-42.3562	-8.3011
sp4	-41.9722	-8.2936
sp4	-40.4719	-3.6057
sp4	-41.0348	-3.7059
sp4	-41.0564	-3.8797
sp4	-40.7089	-4.3224
sp4	-40.9158	-5.1416
sp4	-40.5642	-4.7221
sp4	-39.0394	-5.0741
sp4	-38.2726	-3.9494
sp4	-40.2346	-7.4148
sp4	-40.0838	-7.0854
sp4	-40.0776	-7.1858
sp4	-39.9857	-7.2284
sp4	-39.9657	-7.1125
sp4	-39.6287	-7.1477
sp4	-39.8046	-7.207
sp4	-39.9037	-7.2582
sp4	-39.6287	-7.1477
sp4	-36.6576	-6.7996
sp4	-35.2265	-5.8498
sp4	-35.1076	-6.0773
sp4	-35.0555	-6.254
sp4	-35.115	-6.425
sp4	-37.3844	-7.2532
sp4	-35.723	-9.5924
sp4	-38.4899	-9.8113
sp4	-38.4619	-10.0753
sp4	-41.5057	-10.7867
sp4	-41.1534	-11.5587
sp4	-41.2733	-11.5156
sp4	-41.4153	-11.8542
sp4	-41.8515	-12.4044
sp4	-41.6201	-12.3491
sp4	-41.5752	-12.5434
sp4	-41.416	-12.54
sp4	-41.4212	-12.7448
sp4	-41.65	-12.9333
sp4	-41.4017	-13.0075
sp4	-41.2187	-13.3769
sp4	-42.5409	-14.3081
sp4	-44.0179	-13.3166
sp4	-44.0813	-12.6418
sp4	-44.0446	-12.5859
sp4	-44.0994	-12.5769
sp4	-45.3389	-14.8819
sp4	-39.266	-13.8291
sp4	-39.9754	-13.9024
sp4	-40.3354	-14.6178
sp4	-40.2678	-14.5532
sp4	-40.2689	-14.4204
sp4	-40.2445	-14.3298
sp4	-40.2242	-14.324
sp4	-40.1893	-14.3448
sp4	-40.1894	-14.3756
sp4	-40.1334	-14.4014
sp4	-41.8109	-16.6449
sp5	-42.3333	-8.41667
sp5	-43.4833	-9.21667
sp5	-44.2389	-9.69122
sp5	-42.7266	-8.87986
sp5	-43.4833	-9.21667
sp5	-44.0428	-9.65222
sp5	-44.2389	-9.69122
sp5	-44.9073	-9.61156
sp5	-43.8231	-9.3735
sp5	-42.5677	-8.60542
sp5	-41.9532	-7.38039
sp5	-41.4104	-6.21842
sp5	-41.2702	-6.30186
sp5	-41.5195	-5.37283
sp5	-41.3838	-5.41636
sp5	-41.5589	-12.5289
sp5	-40.8235	-5.0897
sp5	-39.4089	-7.23389
sp5	-43.3421	-7.9717
sp5	-41.0625	-3.72945
sp5	-39.3386	-7.364
sp5	-40.0458	-7.21278
sp5	-40.2303	-14.3222
sp5	-42.475	-14.0689
sp5	-41.6792	-9.8766
sp5	-43.7611	-15.0998
sp5	-42.042	-16.9309
sp5	-44.2823	-15.1912
sp5	-45.2135	-11.0465
sp5	-40.6418	-7.3204
sp5	-43.45	-8.88
sp5	-43.5309	-7.9526
sp5	-43.3421	-7.9717
sp5	-40.7541	-6.6526
sp5	-42.3704	-8.2354
sp5	-42.3333	-8.41667
sp5	-40.0458	-7.21278
sp5	-39.3386	-7.364
sp5	-40.8235	-5.0897
sp5	-39.4089	-7.23389
sp5	-39.7298	-7.0984
sp5	-40.7386	-6.2135
sp5	-41.0625	-3.72945
sp5	-38.243	-8.401
sp5	-39.461	-7.8479
sp5	-44.9451	-12.2012
sp5	-40.2303	-14.3222
sp5	-42.7435	-11.8726
sp5	-42.475	-14.0689
sp5	-38.3238	-12.6978
sp5	-41.1466	-13.7443
sp5	-45.2135	-11.0465
sp5	-41.2845	-13.3789
sp5	-42.7268	-13.9152
sp5	-41.3411	-12.9829
sp5	-41.5589	-12.5289
sp5	-41.6792	-9.8766
sp5	-40.7978	-15.0654
sp5	-42.042	-16.9309
sp5	-41.7908	-15.7032
sp5	-41.8662	-16.6944
sp5	-43.9192	-15.3223
sp5	-44.4272	-15.4717
sp5	-43.7611	-15.0998
sp5	-42.4267	-16.29
sp5	-42.1363	-15.8163
sp5	-45.2135	-11.0465
sp5	-42.6994	-9.01528
sp5	-40.2303	-14.3222
sp5	-42.5406	-14.3073
sp5	-44.9451	-12.2012
sp5	-43.5309	-7.9526
sp5	-41.4458	-12.6243
sp5	-39.5834	-7.2501
sp5	-44.0311	-15.0492
sp5	-39.4896	-7.2449
sp5	-39.5419	-7.29234
sp5	-39.4896	-7.2449
sp5	-39.4939	-7.22787
sp5	-42.475	-14.0689
sp5	-39.5575	-7.28966
sp5	-39.4896	-7.2449
sp5	-43.45	-8.88
sp5	-39.5306	-7.336
sp5	-39.3145	-7.1416
sp5	-44.0524	-14.8519
sp5	-39.4958	-7.2821
sp5	-39.4896	-7.2449
sp5	-37.2238	-8.5865
sp5	-40.2781	-14.4279
sp5	-41.6162	-12.4547
sp5	-42.9452	-14.6475
sp5	-39.5575	-7.28966
sp5	-39.4896	-7.2449
sp5	-44.0311	-15.0492
sp5	-40.2303	-14.3222
sp5	-39.549	-7.30549
sp5	-40.0493	-7.20445
sp5	-39.4896	-7.2449
sp5	-39.4896	-7.2449
sp5	-42.475	-14.0689
sp5	-39.4896	-7.2449
sp5	-44.2823	-15.1912
sp5	-42.475	-14.0689
sp5	-40.2303	-14.3222
sp6	-44.6167	-10.6169
sp6	-43.844	-8.95258
sp6	-44.6812	-9.7761
sp6	-44.9451	-12.2012
sp6	-42.475	-14.0689
sp6	-42.7704	-14.3765
sp6	-41.3411	-12.9829
sp6	-45.0169	-12.4201
sp6	-44.01	-13.3555
sp6	-45.8644	-17.1396
sp6	-44.0667	-15.1333
sp6	-43.9192	-15.3223
sp6	-44.4272	-15.4717
sp6	-46.0924	-17.6933
sp6	-44.0524	-14.8519
sp6	-43.9415	-16.7093
sp6	-44.9419	-17.345
sp6	-45.4179	-9.8108
sp6	-44.9419	-17.345
sp6	-42.5406	-14.3073
sp6	-45.0169	-12.4201
sp6	-43.9415	-16.7093
sp6	-44.2823	-15.1912
sp6	-42.5409	-14.3081
sp6	-41.4458	-12.6243
sp6	-44.9776	-12.3176
sp6	-44.9576	-12.3851
sp6	-45.0178	-17.3987
sp6	-43.9415	-16.7093
sp6	-44.2623	-15.1246
sp6	-42.5277	-14.2736
sp6	-44.0446	-12.5859
sp7	-44.6392	-10.2275
sp7	-44.6392	-10.2275
sp7	-44.6392	-10.2275
sp7	-44.6392	-10.2275
sp7	-44.6392	-10.2275
sp7	-44.6392	-10.2275
sp7	-44.6392	-10.2275
sp7	-44.6392	-10.2275
sp7	-44.6392	-10.2275
sp7	-44.6392	-10.2275
sp7	-44.6392	-10.2275
sp7	-42.3333	-8.41667
sp7	-43.4833	-9.21667
sp7	-44.2389	-9.69122
sp7	-43.4833	-9.21667
sp7	-44.0428	-9.65222
sp7	-44.1555	-9.6338
sp7	-44.9073	-9.61156
sp7	-43.8231	-9.3735
sp7	-42.5677	-8.60542
sp7	-41.4104	-6.21842
sp7	-41.2702	-6.30186
sp7	-39.4089	-7.23389
sp7	-41.0625	-3.72945
sp7	-40.8235	-5.0897
sp7	-38.243	-8.401
sp7	-39.0317	-9.933
sp7	-41.6792	-9.8766
sp7	-42.475	-14.0689
sp7	-38.4808	-10.075
sp7	-41.5589	-12.5289
sp7	-40.6418	-7.3204
sp7	-43.45	-8.88
sp7	-43.7765	-8.1091
sp7	-43.5309	-7.9526
sp7	-44.9073	-9.61156
sp7	-40.7541	-6.6526
sp7	-44.6812	-9.7761
sp7	-42.3704	-8.2354
sp7	-42.3333	-8.41667
sp7	-40.0458	-7.21278
sp7	-39.3386	-7.364
sp7	-40.8235	-5.0897
sp7	-39.4089	-7.23389
sp7	-40.7386	-6.2135
sp7	-40.0898	-7.0997
sp7	-41.0625	-3.72945
sp7	-39.8426	-7.4818
sp7	-38.243	-8.401
sp7	-40.2303	-14.3222
sp7	-42.7435	-11.8726
sp7	-42.7435	-11.8726
sp7	-42.475	-14.0689
sp7	-41.4535	-11.7929
sp7	-39.0317	-9.933
sp7	-41.1466	-13.7443
sp7	-44.3939	-12.2311
sp7	-38.7316	-10.5433
sp7	-45.2135	-11.0465
sp7	-41.2845	-13.3789
sp7	-42.7268	-13.9152
sp7	-42.3531	-11.1124
sp7	-40.0649	-13.8938
sp7	-38.4808	-10.075
sp7	-42.2978	-14.0895
sp7	-40.415	-14.2341
sp7	-40.6131	-13.5358
sp7	-40.9251	-14.1149
sp7	-41.3411	-12.9829
sp7	-41.0759	-10.9583
sp7	-41.5589	-12.5289
sp7	-38.335	-9.3895
sp7	-40.5938	-12.4036
sp7	-44.3521	-10.7455
sp7	-44.01	-13.3555
sp7	-41.6162	-12.4547
sp7	-41.6792	-9.8766
sp7	-41.1405	-12.0378
sp7	-40.7978	-15.0654
sp7	-41.7908	-15.7032
sp7	-44.4272	-15.4717
sp7	-43.7611	-15.0998
sp7	-41.2132	-15.7822
sp7	-43.0392	-15.8312
sp7	-42.022	-15.2767
sp7	-42.1363	-15.8163
sp7	-42.6994	-9.01528
sp7	-44.6392	-10.2275
sp7	-39.4994	-7.2493
sp7	-40.6131	-13.5358
sp7	-41.0804	-10.9405
sp7	-41.5756	-12.5304
sp7	-40.9321	-3.731
sp7	-41.0759	-10.9583
sp7	-39.5834	-7.2501
sp7	-40.7022	-6.2074
sp7	-39.4896	-7.2449
sp7	-44.2823	-15.1912
sp7	-41.5589	-12.5289
sp7	-39.4896	-7.2449
sp7	-39.4896	-7.2449
sp7	-39.4896	-7.2449
sp7	-41.5752	-12.5434
sp7	-39.5834	-7.2501
sp7	-41.3041	-12.92
sp7	-44.2823	-15.1912
sp7	-41.5589	-12.5289
sp7	-41.5589	-12.5289
sp7	-44.2823	-15.1912
sp7	-44.0311	-15.0492
sp7	-41.5752	-12.5434
sp7	-39.5834	-7.2501
sp7	-41.5589	-12.5289
sp7	-39.5834	-7.2501
sp7	-41.5589	-12.5289
sp7	-39.4896	-7.2449
sp7	-39.0386	-5.0744
sp7	-39.5306	-7.336
sp7	-40.0458	-7.21278
sp7	-41.5753	-12.5417
sp7	-43.45	-8.88
sp7	-39.5834	-7.2501
sp7	-39.5834	-7.2501
sp7	-44.2823	-15.1912
sp7	-40.0458	-7.21278
sp7	-39.5834	-7.2501
sp7	-41.5589	-12.5289
sp7	-41.5589	-12.5289
sp7	-39.5306	-7.336
sp7	-44.0524	-14.8519
sp7	-41.5589	-12.5289
sp7	-39.0317	-9.933
sp7	-42.475	-14.0689
sp7	-42.6406	-14.8319
sp7	-39.4896	-7.2449
sp7	-43.5309	-7.9526
sp7	-43.4449	-8.7891
sp7	-42.3562	-8.3011
sp7	-3523	-3.6936
sp7	-41.0348	-3.7059
sp7	-40.8392	-4.0576
sp7	-39.0394	-5.0741
sp7	-36.6576	-6.7996
sp7	-40.1004	-7.1612
sp7	-40.2346	-7.4148
sp7	-39.9857	-7.2284
sp7	-40.0263	-7.0904
sp7	-39.9037	-7.2582
sp7	-40.0965	-7.9627
sp7	-40.7006	-8.0456
sp7	-41.1122	-9.8477
sp7	-38.7044	-10.1996
sp7	-38.6377	-9.8737
sp7	-39.0159	-9.9448
sp7	-39.266	-13.8291
sp7	-39.8285	-12.9118
sp7	-41.433	-11.8481
sp7	-41.5752	-12.5434
sp7	-41.4212	-12.7448
sp7	-41.65	-12.9333
sp7	-41.4017	-13.0075
sp7	-44.0676	-12.5822
sp7	-44.0179	-13.3166
sp7	-40.1796	-13.9583
sp7	-39.266	-13.8291
sp7	-42.5409	-14.3081
sp7	-40.3357	-14.614
sp7	-44.2626	-15.1205
sp7	-44.0522	-14.8479
sp7	-44.0675	-14.933
sp7	-43.7636	-15.9753
sp8	-44.6392	-10.2275
sp8	-44.6392	-10.2275
sp8	-44.6392	-10.2275
sp8	-44.6392	-10.2275
sp8	-40.9167	-4.83333
sp8	-40.9167	-4.83333
sp8	-40.9167	-4.83333
sp8	-40.9167	-4.83333
sp8	-44.6392	-10.2275
sp8	-44.6392	-10.2275
sp8	-44.6392	-10.2275
sp8	-40.9167	-4.83333
sp8	-40.9167	-4.83333
sp8	-40.9167	-4.83333
sp8	-40.9167	-4.83333
sp8	-40.9167	-4.83333
sp8	-42.3333	-8.41667
sp8	-43.4833	-9.21667
sp8	-44.2389	-9.69122
sp8	-43.8433	-6.78639
sp8	-41.2892	-6.96167
sp8	-41.2892	-6.96167
sp8	-42.6173	-8.84392
sp8	-44.2389	-9.69122
sp8	-44.2389	-9.69122
sp8	-44.1555	-9.6338
sp8	-44.9073	-9.61156
sp8	-43.8231	-9.3735
sp8	-41.8268	-8.56142
sp8	-42.5833	-7.45492
sp8	-41.9532	-7.38039
sp8	-40.9955	-7.35497
sp8	-43.1237	-7.02522
sp8	-41.4104	-6.21842
sp8	-41.2702	-6.30186
sp8	-41.3838	-5.41636
sp8	-41.246	-6.8682
sp8	-40.6418	-7.3204
sp8	-43.45	-8.88
sp8	-43.7765	-8.1091
sp8	-42.4861	-8.7784
sp8	-43.844	-8.95258
sp8	-40.7541	-6.6526
sp8	-44.6812	-9.7761
sp8	-42.3704	-8.2354
sp8	-40.864	-7.0816
sp8	-42.3333	-8.41667
sp8	-40.0458	-7.21278
sp8	-39.0135	-7.4951
sp8	-39.5499	-6.5811
sp8	-40.8235	-5.0897
sp8	-39.4089	-7.23389
sp8	-40.9223	-3.9401
sp8	-40.0898	-7.0997
sp8	-39.0315	-4.9791
sp8	-39.9064	-4.4224
sp8	-41.0625	-3.72945
sp8	-36.7019	-5.4125
sp8	-36.0785	-5.2622
sp8	-36.082	-5.3796
sp8	-35.9456	-5.3636
sp8	-36.5895	-5.1755
sp8	-37.4459	-5.0414
sp8	-36.6576	-6.7996
sp8	-35.7087	-5.1889
sp8	-36.8103	-5.7621
sp8	-38.1527	-7.0318
sp8	-38.5293	-7.4597
sp8	-37.9945	-7.0045
sp8	-36.0319	-6.4749
sp8	-35.5888	-7.1912
sp8	-38.2924	-7.7872
sp8	-38.5746	-7.2224
sp8	-37.3963	-6.9472
sp8	-35.5252	-7.4653
sp8	-37.3667	-7.0497
sp8	-38.069	-6.6326
sp8	-37.1517	-6.9379
sp8	-36.3754	-7.1898
sp8	-35.9508	-8.4957
sp8	-36.9624	-8.4246
sp8	-35.8132	-8.1942
sp8	-39.251	-8.4532
sp8	-37.7302	-8.2678
sp8	-40.1783	-7.813
sp8	-39.782	-8.089
sp8	-40.5681	-8.9507
sp8	-38.3894	-8.0119
sp8	-37.5058	-9.1937
sp8	-37.4369	-9.74778
sp8	-36.9801	-9.8366
sp8	-37.9214	-9.6477
sp8	-44.9451	-12.2012
sp8	-40.2303	-14.3222
sp8	-41.2738	-11.8998
sp8	-42.7435	-11.8726
sp8	-42.475	-14.0689
sp8	-41.4535	-11.7929
sp8	-38.3238	-12.6978
sp8	-39.0317	-9.933
sp8	-41.0411	-9.0405
sp8	-39.2052	-11.5001
sp8	-41.1466	-13.7443
sp8	-38.7316	-10.5433
sp8	-42.4531	-11.4584
sp8	-42.7268	-13.9152
sp8	-41.7104	-12.2221
sp8	-42.3531	-11.1124
sp8	-40.4744	-11.2058
sp8	-40.0649	-13.8938
sp8	-38.4808	-10.075
sp8	-40.2336	-9.3546
sp8	-41.0298	-12.4282
sp8	-40.6131	-13.5358
sp8	-41.1431	-11.5409
sp8	-41.3411	-12.9829
sp8	-41.5589	-12.5289
sp8	-38.335	-9.3895
sp8	-39.61	-11.9617
sp8	-39.3595	-11.7863
sp8	-40.5938	-12.4036
sp8	-45.0169	-12.4201
sp8	-44.01	-13.3555
sp8	-41.6162	-12.4547
sp8	-40.1433	-10.4944
sp8	-43.8008	-13.5541
sp8	-44.1724	-12.4304
sp8	-41.1405	-12.0378
sp8	-40.7978	-15.0654
sp8	-40.8861	-15.9829
sp8	-42.042	-16.9309
sp8	-43.989	-17.0945
sp8	-44.7843	-15.3093
sp8	-43.6	-18.2489
sp8	-41.9051	-18.8839
sp8	-44.0667	-15.1333
sp8	-41.8662	-16.6944
sp8	-43.9192	-15.3223
sp8	-44.4272	-15.4717
sp8	-44.0524	-14.8519
sp8	-43.7611	-15.0998
sp8	-43.9415	-16.7093
sp8	-43.5733	-17.3969
sp8	-42.59	-16.2779
sp8	-41.2132	-15.7822
sp8	-42.4267	-16.29
sp8	-43.344	-18.0765
sp8	-43.4573	-18.5186
sp8	-42.1363	-15.8163
sp8	-42.3082	-15.4328
sp8	-41.3111	-12.8558
sp8	-41.5589	-12.5289
sp8	-44.3521	-10.7455
sp8	-39.4994	-7.2493
sp8	-40.2303	-14.3222
sp8	-41.0804	-10.9405
sp8	-41.5752	-12.5434
sp8	-38.4808	-10.075
sp8	-39.0317	-9.933
sp8	-40.5681	-8.9507
sp8	-37.45	-9.725
sp8	-38.6445	-9.872
sp8	-39.5834	-7.2501
sp8	-36.1683	-8.4897
sp8	-39.7398	-7.3727
sp8	-37.2238	-8.5865
sp8	-37.9945	-7.0045
sp8	-44.3521	-10.7455
sp8	-44.3521	-10.7455
sp8	-44.3521	-10.7455
sp8	-37.9945	-7.0045
sp8	-43.5311	-7.948
sp8	-43.2155	-7.6687
sp8	-42.3554	-8.2967
sp8	-41.9718	-8.2895
sp8	-41.2099	-8.1704
sp8	-40.6999	-8.0432
sp8	-41.0559	-3.8749
sp8	-40.9159	-5.1395
sp8	-40.1127	-4.8092
sp8	-39.0395	-5.0721
sp8	-38.8775	-4.3261
sp8	-38.4067	-5.1568
sp8	-38.801	-7.5701
sp8	-39.1992	-7.5747
sp8	-39.0829	-7.2624
sp8	-39.4514	-7.2748
sp8	-39.4899	-7.2427
sp8	-39.5482	-7.3033
sp8	-39.545	-7.3504
sp8	-39.5648	-7.2811
sp8	-39.9857	-7.224
sp8	-39.9683	-7.1084
sp8	-40.0842	-7.0808
sp8	-40.0457	-7.0871
sp8	-40.1011	-7.1564
sp8	-40.1772	-7.1697
sp8	-40.1346	-7.2116
sp8	-39.9857	-7.2256
sp8	-40.0235	-7.1498
sp8	-35.758	-5.1669
sp8	-35.8709	-5.26
sp8	-35.6154	-5.4875
sp8	-36.1138	-5.5192
sp8	-35.8924	-5.4396
sp8	-36.1943	-5.5933
sp8	-36.1399	-5.6411
sp8	-36.1108	-5.6796
sp8	-36.234	-5.803
sp8	-38.2364	-7.0175
sp8	-37.3844	-7.2504
sp8	-36.3608	-7.05258
sp8	-36.6402	-6.7666
sp8	-36.6721	-6.8167
sp8	-36.6823	-6.9206
sp8	-36.7085	-6.926
sp8	-40.3439	-7.8141
sp8	-40.0963	-7.9608
sp8	-40.0758	-7.8728
sp8	-39.7257	-7.5243
sp8	-39.3343	-7.6489
sp8	-38.3152	-8.008
sp8	-37.2366	-8.4732
sp8	-37.1886	-8.3943
sp8	-36.9422	-8.4007
sp8	-40.5527	-8.9877
sp8	-40.0083	-8.9335
sp8	-40.3942	-9.2478
sp8	-41.1094	-9.8804
sp8	-40.6767	-9.7366
sp8	-39.1477	-9.916
sp8	-39.02	-9.9422
sp8	-37.8848	-9.9833
sp8	-37.4331	-9.7379
sp8	-38.3227	-9.3363
sp8	-38.4662	-9.6769
sp8	-38.4899	-9.8073
sp8	-38.4622	-9.9399
sp8	-38.6429	-9.87
sp8	-38.4801	-10.0614
sp8	-39.0203	-9.9417
sp8	-45.0843	-12.6416
sp8	-44.067	-12.5835
sp8	-44.0177	-13.3125
sp8	-41.1532	-11.5546
sp8	-41.4609	-11.8826
sp8	-41.8515	-12.4001
sp8	-41.5788	-12.5516
sp8	-41.422	-12.7398
sp8	-41.6494	-12.9295
sp8	-41.4561	-13.0507
sp8	-41.371	-13.0035
sp8	-39.8551	-12.8869
sp8	-39.8283	-12.908
sp8	-39.2659	-13.8272
sp8	-39.7337	-14.1138
sp8	-40.0567	-13.9144
sp8	-40.1798	-13.9561
sp8	-40.3357	-14.6156
sp8	-40.2676	-14.5512
sp8	-40.2321	-14.353
sp8	-40.2053	-14.3232
sp8	-40.1892	-14.371
sp8	-42.5272	-14.2679
sp8	-42.5405	-14.3039
sp8	-42.6751	-14.4731
sp8	-45.338	-14.8773
sp8	-44.2628	-15.1202
sp8	-41.8105	-16.6411
sp8	-43.6001	-18.1527
sp8	-43.9604	-17.2541
sp8	-43.9408	-16.7048
sp8	-43.7406	-15.9626
sp9	-41.8003	-3.00694
sp9	-41.8003	-3.00694
sp9	-44.5831	-10.25
sp9	-44.9167	-9.81667
sp9	-44.6392	-10.2275
sp9	-42.3333	-8.41667
sp9	-43.4833	-9.21667
sp9	-44.2389	-9.69122
sp9	-41.2892	-6.96167
sp9	-39.0315	-4.9791
sp9	-40.2303	-14.3222
sp9	-42.8561	-13.6673
sp9	-39.782	-8.089
sp9	-38.3965	-5.1581
sp9	-43.844	-8.95258
sp9	-43.5073	-6.8285
sp9	-42.6832	-5.5318
sp9	-40.7541	-6.6526
sp9	-41.2892	-6.96167
sp9	-40.864	-7.0816
sp9	-42.3333	-8.41667
sp9	-40.1196	-6.2582
sp9	-39.735	-6.9439
sp9	-38.8521	-6.89
sp9	-38.9004	-5.2607
sp9	-39.0135	-7.4951
sp9	-40.8235	-5.0897
sp9	-40.3708	-3.8734
sp9	-40.4762	-4.3681
sp9	-38.7456	-4.8026
sp9	-40.726	-4.3173
sp9	-38.4888	-5.6802
sp9	-39.6078	-4.8139
sp9	-40.3061	-3.6334
sp9	-40.4547	-3.5332
sp9	-39.151	-5.7074
sp9	-38.3965	-5.1581
sp9	-40.8322	-5.5934
sp9	-40.0898	-7.0997
sp9	-39.0315	-4.9791
sp9	-39.2304	-5.1529
sp9	-39.9064	-4.4224
sp9	-40.2388	-3.6738
sp9	-38.9465	-5.6979
sp9	-38.1878	-5.2468
sp9	-40.213	-5.8417
sp9	-40.519	-4.2472
sp9	-36.57	-6.2858
sp9	-36.6444	-6.8524
sp9	-36.6576	-6.7996
sp9	-38.1416	-6.1254
sp9	-35.6391	-5.8852
sp9	-37.3401	-6.6314
sp9	-38.1527	-7.0318
sp9	-36.36	-7.4311
sp9	-35.9909	-7.2658
sp9	-36.644	-7.793
sp9	-38.1295	-7.1632
sp9	-37.3963	-6.9472
sp9	-37.3667	-7.0497
sp9	-36.9664	-6.9021
sp9	-36.5674	-7.2067
sp9	-36.5319	-7.3716
sp9	-38.4906	-7.0436
sp9	-37.1517	-6.9379
sp9	-37.2538	-7.2622
sp9	-39.251	-8.4532
sp9	-38.243	-8.401
sp9	-38.7403	-8.7852
sp9	-36.5805	-7.9866
sp9	-40.1783	-7.813
sp9	-39.782	-8.089
sp9	-40.5681	-8.9507
sp9	-38.9178	-8.2385
sp9	-38.3894	-8.0119
sp9	-39.461	-7.8479
sp9	-37.2993	-9.493
sp9	-37.4369	-9.74778
sp9	-36.2951	-9.4689
sp9	-37.3617	-9.6001
sp9	-37.9214	-9.6477
sp9	-37.4529	-11.1725
sp9	-40.2303	-14.3222
sp9	-39.198	-11.9062
sp9	-39.8583	-9.2451
sp9	-39.079	-12.1449
sp9	-38.4224	-9.2067
sp9	-40.0649	-13.8938
sp9	-40.2336	-9.3546
sp9	-41.3892	-12.5793
sp9	-40.415	-14.2341
sp9	-39.5749	-10.7821
sp9	-39.6188	-11.5123
sp9	-38.335	-9.3895
sp9	-42.7756	-14.527
sp9	-39.8586	-11.0538
sp9	-39.3595	-11.7863
sp9	-42.8561	-13.6673
sp9	-40.5938	-12.4036
sp9	-39.095	-11.9804
sp9	-40.8861	-15.9829
sp9	-40.9011	-17.6774
sp9	-42.977	-15.1305
sp9	-40.5298	-17.5614
sp9	-41.1309	-20.0775
sp9	-40.9176	-18.3126
sp9	-40.4501	-19.9245
sp9	-40.8364	-19.6947
sp9	-40.3248	-20.1439
sp9	-40.33	-20.31
sp9	-39.461	-7.8479
sp9	-37.4351	-9.7326
sp9	-40.4448	-9.7398
sp9	-40.2303	-14.3222
sp9	-37.755	-9.6219
sp9	-43.4938	-6.8509
sp9	-43.4744	-6.9631
sp9	-43.2155	-7.6713
sp9	-42.555	-8.8289
sp9	-42.3562	-8.3011
sp9	-41.2102	-8.1747
sp9	-40.9158	-5.1416
sp9	-39.0704	-5.1261
sp9	-40.0838	-7.0854
sp9	-39.9857	-7.2284
sp9	-39.5489	-7.3054
sp9	-39.4895	-7.2449
sp9	-39.5599	-6.9121
sp9	-38.8005	-7.5744
sp9	-36.2345	-5.8082
sp9	-36.6576	-6.7996
sp9	-36.6817	-6.9235
sp9	-35.2041	-8.4009
sp9	-36.0255	-8.3695
sp9	-35.4599	-8.578
sp9	-37.2366	-8.4755
sp9	-38.4461	-8.6427
sp9	-39.8427	-7.7136
sp9	-35.8795	-9.2254
sp9	-37.3482	-10.7812
sp9	-41.4212	-12.7448
sp9	-40.6771	-9.7409
sp9	-39.7775	-9.1738
sp9	-39.0204	-9.944
sp9	-38.7044	-10.1996
sp9	-38.4909	-9.6665
sp9	-38.613	-9.4685
sp9	-40.1893	-14.3448
sp9	-39.5336	-15.17
sp9	-40.0795	-14.4367
sp9	-40.3354	-14.6178
sp9	-39.1697	-16.3876
sp9	-39.3634	-17.6777
sp9	-40.0681	-19.1504
sp9	-41.0334	-20.071
sp10	-45.1429	-10.4812
sp10	-45.1429	-10.4812
sp10	-45.1429	-10.4812
sp10	-45.1429	-10.4812
sp10	-41.6	-3.65
sp10	-44.6392	-10.2275
sp10	-44.6392	-10.2275
sp10	-44.6392	-10.2275
sp10	-41.6	-3.65
sp10	-42.3333	-8.41667
sp10	-45.5844	-9.80556
sp10	-43.4833	-9.21667
sp10	-44.2389	-9.69122
sp10	-41.7847	-3.4563
sp10	-41.8287	-2.8299
sp10	-40.7541	-6.6526
sp10	-38.9004	-5.2607
sp10	-39.0135	-7.4951
sp10	-40.4355	-3.9034
sp10	-40.8235	-5.0897
sp10	-40.3708	-3.8734
sp10	-38.934	-4.2688
sp10	-40.726	-4.3173
sp10	-39.5804	-3.6438
sp10	-38.6261	-3.9719
sp10	-38.9303	-4.239
sp10	-39.0315	-4.9791
sp10	-40.2388	-3.6738
sp10	-37.3944	-7.3302
sp10	-38.0058	-6.5475
sp10	-38.243	-8.401
sp10	-40.1068	-9.0534
sp10	-40.5681	-8.9507
sp10	-37.4369	-9.74778
sp10	-44.9451	-12.2012
sp10	-42.475	-14.0689
sp10	-41.1466	-13.7443
sp10	-39.8583	-9.2451
sp10	-38.7316	-10.5433
sp10	-38.4808	-10.075
sp10	-39.3595	-11.7863
sp10	-40.5938	-12.4036
sp10	-41.6792	-9.8766
sp10	-44.0667	-15.1333
sp10	-43.7611	-15.0998
sp10	-41.1431	-11.5409
sp10	-42.3333	-8.41667
sp10	-38.9162	-4.2668
sp10	-42.4861	-8.7784
sp10	-38.9178	-8.2385
sp10	-39.3145	-7.1416
sp10	-37.4284	-11.3692
sp10	-40.9161	-5.1629
sp10	-39.0386	-5.0744
sp10	-39.7775	-9.17389
sp10	-37.4284	-11.3692
sp10	-39.7775	-9.17389
sp10	-39.7775	-9.17389
sp10	-40.9161	-5.1629
sp10	-35.8968	-9.2317
sp10	-37.4284	-11.3692
sp10	-39.5834	-7.2501
sp10	-39.7775	-9.17389
sp10	-39.7775	-9.17389
sp10	-39.7775	-9.17389
sp10	-39.7775	-9.17389
sp10	-39.7775	-9.17389
sp10	-35.8968	-9.2317
sp10	-40.9161	-5.1629
sp10	-39.0386	-5.0744
sp10	-39.7775	-9.17389
sp10	-39.7775	-9.17389
sp10	-39.7775	-9.17389
sp10	-39.7775	-9.17389
sp10	-39.8892	-9.1842
sp10	-39.7775	-9.17389
sp10	-39.0386	-5.0744
sp10	-39.7775	-9.17389
sp10	-39.7775	-9.17389
sp10	-39.7775	-9.17389
sp10	-39.7775	-9.17389
sp10	-39.7775	-9.17389
sp10	-39.7775	-9.17389
sp10	-39.7775	-9.17389
sp10	-39.7775	-9.17389
sp10	-39.9183	-5.9006
sp10	-35.8968	-9.2317
sp10	-39.7775	-9.17389
sp10	-39.7775	-9.17389
sp10	-39.7775	-9.17389
sp10	-39.9712	-15.0682
sp10	-43.4931	-6.8562
sp10	-40.4614	-3.7681
sp10	-40.9158	-5.1416
sp10	-38.6431	-3.971
sp10	-38.93	-4.2434
sp10	-39.0394	-5.0741
sp10	-39.0704	-5.1261
sp10	-39.4895	-7.2449
sp10	-39.9037	-7.2582
sp10	-40.1349	-7.2159
sp10	-36.6576	-6.7996
sp10	-38.2357	-7.02188
sp10	-38.2293	-7.0137
sp10	-38.4461	-8.6427
sp10	-35.839	-9.237
sp10	-39.7775	-9.1738
sp10	-39.8936	-9.1472
sp10	-38.6377	-9.8737
sp10	-39.0204	-9.944
sp10	-37.4284	-11.3692
sp10	-44.0985	-12.5732
sp10	-44.2623	-15.1246
sp10	-44.0077	-15.0949
sp11	-39.037	-4.3772
sp11	-38.8733	-4.3222
sp11	-38.6258	-3.7044
sp11	-38.934	-4.2688
sp11	-38.7456	-4.8026
sp11	-38.9495	-4.303
sp11	-38.9303	-4.239
sp11	-39.0315	-4.9791
sp11	-38.9331	-4.2403
sp11	-38.9331	-4.2403
sp11	-38.9312	-4.24317
sp11	-38.9331	-4.2403
sp11	-38.9331	-4.2403
sp11	-38.9331	-4.2403
sp11	-38.9312	-4.24317
sp11	-39.0062	-4.3015
sp11	-38.9331	-4.2403
sp11	-38.9312	-4.24317
sp11	-38.9331	-4.2403
sp11	-38.9331	-4.2403
sp12	-14.3222	-40.2303
sp12	-15.9045	-39.5565
sp12	-15.4133	-39.8484
sp12	-15.0256	-40.0679
sp12	-13.8938	-40.0649
sp12	-13.6324	-40.3971
sp12	-13.45	-40.4666
sp12	-12.9535	-39.6875
sp12	-14.485	-40.4696
sp12	-15.6974	-39.6217
sp12	-14.3299	-40.2446
sp12	-14.4465	-40.068
sp12	-14.3494	-40.248
sp12	-14.42	-40.1359
sp12	-14.3299	-40.2446
sp12	-14.42	-40.1359
sp12	-16.0648	-40.0592
sp12	-14.3494	-40.248
sp12	-14.42	-40.1359
sp12	-14.42	-40.1359
sp12	-14.42	-40.1359
sp12	-14.42	-40.1359
sp12	-14.4465	-40.068
sp12	-14.42	-40.1359
sp12	-14.42	-40.1359
sp12	-14.3297	-40.2153
sp12	-14.42	-40.1359
sp12	-14.4279	-40.2781
sp12	-14.42	-40.1359
sp12	-14.42	-40.1359
sp12	-14.42	-40.1359
sp12	-14.42	-40.1359
sp12	-14.42	-40.1359
sp12	-14.3494	-40.248
sp12	-14.3297	-40.2153
sp12	-14.42	-40.1359
sp12	-14.42	-40.1359
sp12	-13.8938	-40.0649
sp12	-16.0648	-40.0592
sp12	-14.42	-40.1359
sp12	-14.42	-40.1359
sp12	-14.42	-40.1359
sp12	-14.365	-40.183
sp12	-14.369	-40.2563
sp12	-14.37	-40.1886
sp12	-14.3841	-40.2083
sp12	-14.3647	-40.2275
sp12	-14.33	-40.205
sp12	-14.4247	-40.2672
sp12	-14.4044	-40.2625
sp12	-14.3883	-40.2647
sp12	-14.385	-40.2066
sp12	-14.3569	-40.1861
sp12	-14.4205	-40.2525
sp12	-14.3541	-40.2161
sp12	-14.263	-40.4272
sp12	-14.5388	-40.3208
sp12	-15.1333	-39.95
sp12	-15.55	-39.8813
sp12	-12.8886	-39.8553
sp12	-12.9118	-39.8285
sp12	-13.8291	-39.266
sp12	-14.6178	-40.3354
sp12	-14.5532	-40.2678
sp12	-13.9583	-40.1796
sp12	-13.9263	-40.1104
sp12	-13.9166	-40.0568
sp12	-14.4204	-40.2689
sp12	-14.4014	-40.1334
sp12	-14.3859	-40.1842
sp12	-14.3756	-40.1894
sp12	-14.3448	-40.1893
sp12	-14.3558	-40.232
sp13	-40.9167	-4.83333
sp13	-40.9167	-4.83333
sp13	-42.3333	-8.41667
sp13	-43.4833	-9.21667
sp13	-44.2389	-9.69122
sp13	-42.7266	-8.87986
sp13	-43.4833	-9.21667
sp13	-44.2389	-9.69122
sp13	-44.2389	-9.69122
sp13	-44.2389	-9.69122
sp13	-43.8231	-9.3735
sp13	-42.5677	-8.60542
sp13	-41.9532	-7.38039
sp13	-41.4104	-6.21842
sp13	-41.5195	-5.37283
sp13	-41.3838	-5.41636
sp13	-40.8235	-5.0897
sp13	-41.5237	-8.0389
sp13	-41.5589	-12.5289
sp13	-44.2823	-15.1912
sp13	-43.4391	-19.0459
sp13	-40.8861	-15.9829
sp13	-43.6	-18.2489
sp13	-43.1727	-18.6501
sp13	-43.4573	-18.5186
sp13	-43.0392	-15.8312
sp13	-41.0625	-3.72945
sp13	-38.2884	-3.9735
sp13	-39.4089	-7.23389
sp13	-39.2689	-3.27778
sp13	-39.8426	-7.4818
sp13	-40.2303	-14.3222
sp13	-41.3111	-12.8558
sp13	-36.0364	-8.2147
sp13	-37.2538	-7.2622
sp13	-38.2924	-7.7872
sp13	-40.6418	-7.3204
sp13	-43.45	-8.88
sp13	-43.7765	-8.1091
sp13	-43.844	-8.95258
sp13	-43.8231	-9.3735
sp13	-41.5461	-8.476
sp13	-40.7541	-6.6526
sp13	-41.5237	-8.0389
sp13	-42.3704	-8.2354
sp13	-40.864	-7.0816
sp13	-42.3333	-8.41667
sp13	-40.5609	-3.554
sp13	-38.2884	-3.9735
sp13	-38.7933	-4.3521
sp13	-40.0458	-7.21278
sp13	-39.3386	-7.364
sp13	-40.8235	-5.0897
sp13	-39.4089	-7.23389
sp13	-38.4385	-3.8114
sp13	-37.7794	-4.4282
sp13	-37.3028	-4.7847
sp13	-38.9038	-6.412
sp13	-38.7242	-7.4495
sp13	-40.4547	-3.5332
sp13	-38.6261	-3.9719
sp13	-39.076	-3.767
sp13	-40.0898	-7.0997
sp13	-38.9808	-3.6653
sp13	-41.0625	-3.72945
sp13	-39.2689	-3.27778
sp13	-36.0785	-5.2622
sp13	-35.9456	-5.3636
sp13	-35.8378	-5.22278
sp13	-35.9398	-5.1736
sp13	-35.7087	-5.1889
sp13	-37.419	-4.8996
sp13	-38.5293	-7.4597
sp13	-36.0319	-6.4749
sp13	-37.3997	-7.2489
sp13	-38.2924	-7.7872
sp13	-37.3944	-7.3302
sp13	-38.069	-6.6326
sp13	-37.2538	-7.2622
sp13	-36.1683	-8.4897
sp13	-36.9624	-8.4246
sp13	-36.0364	-8.2147
sp13	-37.7302	-8.2678
sp13	-40.2256	-7.5625
sp13	-40.1783	-7.813
sp13	-40.5681	-8.9507
sp13	-41.8437	-13.2927
sp13	-40.2303	-14.3222
sp13	-39.8544	-13.1434
sp13	-42.7435	-11.8726
sp13	-42.7435	-11.8726
sp13	-42.475	-14.0689
sp13	-41.4535	-11.7929
sp13	-38.3238	-12.6978
sp13	-39.0317	-9.933
sp13	-42.1339	-11.0803
sp13	-39.2052	-11.5001
sp13	-41.1466	-13.7443
sp13	-38.7316	-10.5433
sp13	-42.4531	-11.4584
sp13	-41.2845	-13.3789
sp13	-42.7268	-13.9152
sp13	-41.7104	-12.2221
sp13	-40.9738	-13.0273
sp13	-42.3531	-11.1124
sp13	-40.0649	-13.8938
sp13	-38.4808	-10.075
sp13	-42.2978	-14.0895
sp13	-41.0298	-12.4282
sp13	-41.3892	-12.5793
sp13	-45.8067	-12.368
sp13	-40.6131	-13.5358
sp13	-41.1431	-11.5409
sp13	-41.3411	-12.9829
sp13	-41.5589	-12.5289
sp13	-38.335	-9.3895
sp13	-39.61	-11.9617
sp13	-42.7756	-14.527
sp13	-38.5632	-8.9723
sp13	-44.3521	-10.7455
sp13	-44.01	-13.3555
sp13	-41.6162	-12.4547
sp13	-40.1433	-10.4944
sp13	-41.6792	-9.8766
sp13	-41.1405	-12.0378
sp13	-40.7978	-15.0654
sp13	-40.8861	-15.9829
sp13	-42.042	-16.9309
sp13	-43.989	-17.0945
sp13	-42.799	-16.9092
sp13	-43.4391	-19.0459
sp13	-44.4313	-15.2326
sp13	-43.4742	-17.9915
sp13	-43.6	-18.2489
sp13	-43.2602	-18.0743
sp13	-41.9051	-18.8839
sp13	-42.8951	-18.8168
sp13	-44.0667	-15.1333
sp13	-44.4272	-15.4717
sp13	-40.8037	-16.2981
sp13	-44.0524	-14.8519
sp13	-43.7611	-15.0998
sp13	-44.3701	-14.8344
sp13	-43.9415	-16.7093
sp13	-43.3694	-19.222
sp13	-41.831	-17.4192
sp13	-43.5733	-17.3969
sp13	-42.59	-16.2779
sp13	-41.2132	-15.7822
sp13	-43.0392	-15.8312
sp13	-43.1727	-18.6501
sp13	-43.7213	-19.164
sp13	-43.344	-18.0765
sp13	-43.4573	-18.5186
sp13	-42.1363	-15.8163
sp13	-42.6994	-9.01528
sp13	-41.3038	-12.8558
sp13	-39.8426	-7.4818
sp13	-41.5589	-12.5289
sp13	-40.2303	-14.3222
sp13	-41.0804	-10.9405
sp13	-41.5757	-12.5304
sp13	-40.5681	-8.9507
sp13	-39.3501	-7.3834
sp13	-39.2616	-3.3303
sp13	-37.2238	-8.5865
sp13	-43.5733	-17.3969
sp13	-36.1683	-8.4897
sp13	-39.5834	-7.2501
sp13	-39.0317	-9.933
sp13	-45.4321	-17.1148
sp13	-38.4808	-10.075
sp13	-39.5834	-7.2501
sp13	-40.068	-14.4465
sp13	-43.989	-17.0945
sp13	-40.2153	-14.3297
sp13	-41.1431	-11.5409
sp13	-40.068	-14.4465
sp13	-40.068	-14.4465
sp13	-43.989	-17.0945
sp13	-39.0386	-5.0744
sp13	-43.5349	-13.1512
sp13	-40.068	-14.4465
sp13	-41.1431	-11.5409
sp13	-41.4818	-12.5893
sp13	-40.1359	-14.42
sp13	-43.989	-17.0945
sp13	-41.4818	-12.5893
sp13	-39.5834	-7.2501
sp13	-40.068	-14.4465
sp13	-38.6445	-9.872
sp13	-41.4818	-12.5893
sp13	-41.4458	-12.6243
sp13	-40.068	-14.4465
sp13	-41.4818	-12.5893
sp13	-40.068	-14.4465
sp13	-40.2153	-14.3297
sp13	-42.475	-14.0689
sp13	-39.0317	-9.933
sp13	-40.1359	-14.42
sp13	-45.0075	-20.1078
sp13	-41.2968	-13.2595
sp13	-40.2153	-14.3297
sp13	-40.2446	-14.3299
sp13	-42.475	-14.0689
sp13	-41.2968	-13.2595
sp13	-39.5306	-7.336
sp13	-42.9452	-14.6475
sp13	-43.5349	-13.1512
sp13	-45.0075	-20.1078
sp13	-40.1359	-14.42
sp13	-39.5306	-7.336
sp13	-40.068	-14.4465
sp13	-44.9419	-17.345
sp13	-40.068	-14.4465
sp13	-40.2446	-14.3299
sp13	-41.2968	-13.2595
sp13	-41.2968	-13.2595
sp13	-43.7213	-19.164
sp13	-41.4818	-12.5893
sp13	-43.5349	-13.1512
sp13	-41.4818	-12.5893
sp13	-41.4818	-12.5893
sp13	-44.4272	-15.4717
sp13	-40.1359	-14.42
sp13	-40.068	-14.4465
sp13	-41.4818	-12.5893
sp13	-44.067	-14.9371
sp13	-42.6406	-14.8319
sp13	-39.5834	-7.2501
sp13	-40.1359	-14.42
sp13	-39.5834	-7.2501
sp13	-40.2153	-14.3297
sp13	-39.5834	-7.2501
sp13	-41.4818	-12.5893
sp13	-40.1359	-14.42
sp13	-41.4818	-12.5893
sp13	-41.4818	-12.5893
sp13	-41.2968	-13.2595
sp13	-40.1359	-14.42
sp13	-40.1359	-14.42
sp13	-39.5834	-7.2501
sp13	-41.4818	-12.5893
sp13	-41.4818	-12.5893
sp13	-41.4818	-12.5893
sp13	-37.4547	-8.1337
sp13	-40.1359	-14.42
sp13	-41.6162	-12.4547
sp13	-42.475	-14.0689
sp13	-41.4818	-12.5893
sp13	-41.4818	-12.5893
sp13	-41.2968	-13.2595
sp13	-41.3041	-12.92
sp13	-40.068	-14.4465
sp13	-39.5834	-7.2501
sp13	-39.0317	-9.933
sp13	-41.2968	-13.2595
sp13	-40.1359	-14.42
sp13	-42.9452	-14.6475
sp13	-39.5306	-7.336
sp13	-45.0075	-20.1078
sp13	-40.068	-14.4465
sp13	-40.1359	-14.42
sp13	-41.4818	-12.5893
sp13	-43.7213	-19.164
sp13	-39.5306	-7.336
sp13	-43.36	-9.1932
sp13	-42.3562	-8.3011
sp13	-41.9722	-8.2936
sp13	-40.7006	-8.0456
sp13	-40.6687	-7.8225
sp13	-41.0564	-3.8797
sp13	-41.0348	-3.7059
sp13	-40.4719	-3.6057
sp13	-40.3523	-3.6936
sp13	-38.5582	-3.7964
sp13	-38.3068	-3.9363
sp13	-39.0394	-5.0741
sp13	-40.1349	-7.2159
sp13	-39.9857	-7.2284
sp13	-40.1004	-7.1612
sp13	-40.0827	-7.0792
sp13	-39.9709	-7.1106
sp13	-40.0227	-7.1527
sp13	-39.5945	-7.3382
sp13	-39.5306	-7.336
sp13	-39.5489	-7.3054
sp13	-39.5651	-7.2866
sp13	-39.4896	-7.2423
sp13	-39.4128	-7.2292
sp13	-35.6153	-5.4902
sp13	-37.3381	-4.8603
sp13	-36.657	-6.7939
sp13	-36.8894	-6.8901
sp13	-36.7072	-6.9351
sp13	-37.3844	-7.2532
sp13	-36.6804	-6.8511
sp13	-37.3844	-7.2532
sp13	-41.126	-9.8902
sp13	-40.4976	-9.3875
sp13	-39.0204	-9.944
sp13	-38.4665	-9.6644
sp13	-38.7044	-10.1996
sp13	-38.4619	-10.0753
sp13	-41.5057	-10.7862
sp13	-41.1534	-11.5587
sp13	-41.433	-11.8481
sp13	-41.4599	-11.8842
sp13	-39.8285	-12.9118
sp13	-41.8515	-12.4044
sp13	-41.6201	-12.3491
sp13	-41.3779	-12.5426
sp13	-41.3703	-13.0049
sp13	-41.3708	-13.0071
sp13	-41.4212	-12.7448
sp13	-41.4556	-12.6005
sp13	-41.3779	-12.5426
sp13	-44.9996	-12.3114
sp13	-44.0814	-12.6395
sp13	-44.0178	-13.3142
sp13	-43.4699	-13.4349
sp13	-44.2623	-15.1246
sp13	-44.067	-14.9371
sp13	-42.6753	-14.4772
sp13	-42.5275	-14.2693
sp13	-39.266	-13.8243
sp13	-40.1101	-13.9236
sp13	-40.0246	-13.9484
sp13	-40.0105	-13.8949
sp13	-39.266	-13.8291
sp13	-40.3354	-14.6178
sp13	-40.2689	-14.4204
sp13	-40.1894	-14.3756
sp13	-40.232	-14.3558
sp13	-40.2575	-14.3389
sp13	-40.2579	-14.3411
sp13	-43.7636	-15.9796
sp13	-41.8109	-16.6449
sp13	-43.9415	-16.7093
sp13	-44.9355	-17.3496
sp13	-44.1516	-17.366
sp13	-43.6005	-18.1559
sp13	-43.0895	-18.6654
sp13	-43.9406	-19.148
sp13	-43.398	-18.8938
sp13	-43.6059	-19.3509
sp14	-43.4833	-9.21667
sp14	-44.2389	-9.69122
sp14	-44.1555	-9.6338
sp14	-43.8231	-9.3735
sp14	-40.7539	-6.58958
sp14	-40.0458	-7.21278
sp14	-39.037	-4.3772
sp14	-39.3386	-7.364
sp14	-39.4216	-4.4093
sp14	-40.8235	-5.0897
sp14	-39.4089	-7.23389
sp14	-40.8008	-4.0477
sp14	-40.7871	-4.2101
sp14	-38.934	-4.2688
sp14	-40.726	-4.3173
sp14	-39.5853	-4.578
sp14	-39.1992	-7.5774
sp14	-38.9495	-4.303
sp14	-39.7298	-7.0984
sp14	-40.0898	-7.0997
sp14	-41.0625	-3.72945
sp14	-40.9271	-3.8531
sp14	-41.0933	-3.5944
sp14	-39.8426	-7.4818
sp14	-40.2256	-7.5625
sp14	-38.9323	-4.241
sp14	-40.9271	-3.8531
sp14	-39.5834	-7.2501
sp14	-39.3501	-7.3834
sp14	-38.6287	-3.961
sp14	-40.2678	-14.5532
sp14	-40.2972	-14.5727
sp14	-39.9857	-7.2284
sp14	-39.3348	-7.6527
sp14	-39.1992	-7.5774
sp14	-39.3544	-7.3838
sp14	-39.4104	-7.3329
sp14	-39.4511	-7.2777
sp14	-39.5651	-7.2866
sp14	-39.4657	-7.2319
sp14	-39.9857	-7.2284
sp14	-38.6431	-3.971
sp14	-38.9362	-4.2675
sp14	-38.9329	-4.2615
sp14	-38.9299	-4.2506
sp14	-38.93	-4.2434
sp14	-38.9205	-4.2459
sp14	-40.8161	-4.1258
sp14	-40.8392	-4.0576
sp14	-40.8492	-4.0197
sp14	-40.8697	-3.9058
sp14	-40.9392	-3.8405
sp14	-40.9014	-3.8412
sp14	-40.912	-3.8411
sp14	-40.9312	-3.7224
sp14	-40.9361	-3.7177
sp14	-41.0038	-3.6872
sp14	-41.0933	-3.5943
sp15	-42.3333	-8.41667
sp15	-42.3704	-8.2354
sp15	-39.037	-4.3772
sp15	-38.934	-4.2688
sp15	-40.7386	-6.2135
sp15	-35.7118	-6.9359
sp15	-35.9909	-7.2658
sp15	-37.3944	-7.3302
sp15	-37.2538	-7.2622
sp15	-34.9655	-7.9804
sp15	-38.243	-8.401
sp15	-34.861	-7.7757
sp15	-35.8592	-8.6963
sp15	-35.1759	-8.7308
sp15	-36.3614	-7.8515
sp15	-36.0893	-7.8632
sp15	-35.9334	-9.3001
sp15	-37.4369	-9.74778
sp15	-36.9801	-9.8366
sp15	-37.1717	-10.8061
sp15	-37.0951	-10.8318
sp15	-40.2303	-14.3222
sp15	-37.9384	-11.8214
sp15	-42.7268	-13.9152
sp15	-37.5334	-11.6185
sp15	-39.152	-13.8764
sp15	-39.1593	-13.7769
sp15	-40.0649	-13.8938
sp15	-41.5589	-12.5289
sp15	-38.335	-9.3895
sp15	-41.6792	-9.8766
sp15	-40.5473	-6.5245
sp15	-46.4607	-7.2004
sp15	-35.1006	-8.7547
sp15	-42.3562	-8.3011
sp15	-40.76	-4.1678
sp15	-38.9299	-4.2506
sp15	-36.6576	-6.7996
sp15	-35.7161	-6.9735
sp15	-34.9171	-7.8516
sp15	-36.0255	-8.3695
sp15	-35.7925	-8.5876
sp15	-35.1759	-8.7308
sp15	-35.1006	-8.7547
sp15	-36.0185	-9.166
sp15	-36.6088	-9.321
sp15	-38.2241	-9.4097
sp15	-41.2187	-13.3769
sp15	-39.266	-13.8291
sp15	-39.1591	-13.878
sp16	-44.6392	-10.2275
sp16	-44.6392	-10.2275
sp16	-44.2389	-9.69122
sp16	-40.9955	-7.35497
sp16	-40.9955	-7.35497
sp16	-40.6418	-7.3204
sp16	-42.1686	-4.82778
sp16	-40.6372	-6.8681
sp16	-42.4482	-8.196
sp16	-40.864	-7.0816
sp16	-42.3333	-8.41667
sp16	-40.2129	-6.6813
sp16	-40.0458	-7.21278
sp16	-39.4089	-7.23389
sp16	-40.0898	-7.0997
sp16	-37.6268	-7.8523
sp16	-39.314	-8.5206
sp16	-37.722	-8.321
sp16	-38.2087	-8.543
sp16	-38.7403	-8.7852
sp16	-38.221	-9.1371
sp16	-40.1783	-7.813
sp16	-40.5681	-8.9507
sp16	-37.3088	-8.6556
sp16	-38.033	-9.4184
sp16	-37.2993	-9.493
sp16	-37.4369	-9.74778
sp16	-36.9801	-9.8366
sp16	-37.6882	-9.7959
sp16	-40.1415	-11.9741
sp16	-43.0176	-10.8995
sp16	-40.2303	-14.3222
sp16	-43.5397	-13.1512
sp16	-42.7435	-11.8726
sp16	-42.7435	-11.8726
sp16	-41.4535	-11.7929
sp16	-39.0317	-9.933
sp16	-41.0411	-9.0405
sp16	-39.2052	-11.5001
sp16	-41.1466	-13.7443
sp16	-39.8583	-9.2451
sp16	-38.7316	-10.5433
sp16	-38.4224	-9.2067
sp16	-39.8789	-12.7326
sp16	-38.2907	-11.7182
sp16	-39.8503	-12.1111
sp16	-40.1409	-12.4791
sp16	-40.0649	-13.8938
sp16	-41.5219	-11.2457
sp16	-40.2336	-9.3546
sp16	-41.8324	-13.692
sp16	-40.2674	-12.1428
sp16	-39.0989	-9.5973
sp16	-39.5111	-10.3581
sp16	-43.3371	-12.0385
sp16	-39.5749	-10.7821
sp16	-39.6188	-11.5123
sp16	-41.0759	-10.9583
sp16	-38.335	-9.3895
sp16	-39.6574	-11.8979
sp16	-39.4028	-11.7972
sp16	-38.5632	-8.9723
sp16	-40.7038	-12.2098
sp16	-38.9975	-11.8386
sp16	-45.0169	-12.4201
sp16	-39.0079	-12.4167
sp16	-41.6792	-9.8766
sp16	-43.8008	-13.5541
sp16	-43.5448	-12.9326
sp16	-40.8347	-9.647
sp16	-44.1724	-12.4304
sp16	-39.4992	-11.3784
sp16	-44.0311	-15.0492
sp16	-43.9192	-15.3223
sp16	-44.4272	-15.4717
sp16	-44.0524	-14.8519
sp16	-44.9419	-17.345
sp16	-40.0839	-7.0855
sp16	-40.0898	-7.0997
sp16	-40.0898	-7.0997
sp16	-39.9933	-7.0781
sp16	-39.5834	-7.2501
sp16	-39.8882	-9.1839
sp16	-39.8848	-9.1955
sp16	-39.8583	-9.2451
sp16	-39.8774	-9.2533
sp16	-39.8995	-9.2601
sp16	-39.0317	-9.933
sp16	-38.9865	-9.9422
sp16	-39.0317	-9.933
sp16	-40.8142	-9.5923
sp16	-41.3138	-9.7419
sp16	-42.1826	-10.0068
sp16	-40.0981	-12.4269
sp16	-43.5397	-13.1512
sp16	-44.4013	-15.5664
sp16	-42.3562	-8.3011
sp16	-39.4895	-7.2448
sp16	-40.0838	-7.0854
sp16	-39.9933	-7.0781
sp16	-40.0412	-7.0946
sp16	-40.0268	-7.1126
sp16	-40.1004	-7.1612
sp16	-40.3439	-7.8161
sp16	-40.0965	-7.9627
sp16	-38.4629	-9.9447
sp16	-38.4658	-9.6785
sp16	-39.0204	-9.944
sp16	-39.1058	-9.1766
sp16	-39.0013	-10.0168
sp16	-39.046	-9.8961
sp16	-39.7775	-9.1738
sp16	-39.8613	-9.2459
sp16	-39.8995	-9.2601
sp16	-39.8848	-9.1932
sp16	-39.9371	-9.1173
sp16	-39.913	-8.9997
sp16	-40.1228	-9.5123
sp16	-41.3138	-9.7419
sp16	-40.8142	-9.5923
sp16	-40.4707	-9.4302
sp16	-40.5361	-9.405
sp16	-40.5492	-9.3299
sp16	-40.613	-9.222
sp16	-40.4459	-9.293
sp16	-40.4286	-9.2548
sp16	-40.3937	-9.2511
sp16	-42.1826	-10.0068
sp16	-39.266	-13.8291
sp16	-40.0981	-12.4269
sp16	-40.1842	-14.3859
sp16	-41.3779	-12.5426
sp16	-41.6162	-12.4546
sp16	-43.4699	-13.4349
sp16	-43.5411	-13.1462
sp16	-44.0077	-15.0949
sp16	-44.2623	-15.1246
sp16	-44.4013	-15.5664
sp16	-44.9355	-17.3496
sp17	-42.7266	-8.87986
sp17	-42.7329	-8.85633
sp17	-42.7329	-8.85633
sp17	-42.7329	-8.85633
sp17	-41.2254	-5.29592
sp17	-39.0282	-9.89618
sp17	-40.0839	-7.0855
sp17	-40.4968	-9.38875
sp17	-37.1886	-8.39656
sp17	-40.5361	-9.40503
sp17	-39.4896	-7.2449
sp17	-40.2153	-14.3297
sp17	-38.9958	-9.95624
sp17	-40.2153	-14.3297
sp17	-40.2781	-14.4279
sp17	-40.1894	-14.3449
sp17	-38.9958	-9.95624
sp17	-38.4817	-10.0277
sp17	-39.1553	-9.96074
sp17	-40.2153	-14.3297
sp17	-40.613	-9.22208
sp17	-39.4896	-7.2449
sp17	-38.9958	-9.95624
sp17	-38.4817	-10.0277
sp17	-40.2692	-12.5072
sp17	-39.0282	-9.89618
sp17	-40.2153	-14.3297
sp17	-39.1474	-9.92189
sp17	-40.2692	-12.5072
sp17	-40.7006	-8.0456
sp17	-41.2254	-5.29592
sp17	-40.7541	-6.6526
sp17	-40.864	-7.0816
sp17	-40.7341	-7.6954
sp17	-40.2129	-6.6813
sp17	-39.9575	-6.7362
sp17	-40.0458	-7.21278
sp17	-39.5834	-7.2501
sp17	-40.9223	-3.9401
sp17	-37.3028	-4.7847
sp17	-40.726	-4.3173
sp17	-40.0898	-7.0997
sp17	-41.0625	-3.72945
[truncated: 378 more rows]
